# Supplementary material for: High-resolution FTIR spectroscopy of benzaldehyde in the far-infrared region: probing the rotational barrier
Source: Royal Society of Chemistry journal article supplement (doi:10.1039/d1cp00188d), 2021-01-01
Supplement: d1cp00188d1.pdf [file d1cp00188d1.pdf]

Electronic Supplementary Information for:

High-resolution FTIR spectroscopy of benzaldehyde in the far infrared region: probing the rotational barrier

Yue Liang,<sup>a#</sup> Yichi Zhang,<sup>a,b#</sup> Csaba Fábri,<sup>c,d</sup> Jiarui Ma,<sup>a,b</sup> Jianbao Zhao,<sup>e</sup> Brant Billingham<sup>e</sup> and Ziqiu Chen<sup>a\*</sup>

<sup>a</sup> College of Chemistry and Chemical Engineering, Lanzhou University, 222 South Tianshui Rd, Lanzhou 730000, China

<sup>b</sup> Cuiying Honors College, Lanzhou University, 222 South Tianshui Rd, Lanzhou 730000, China

<sup>c</sup> Laboratory of Molecular Structure and Dynamics, Institute of Chemistry, Eötvös Loránd University, Pázmány Péter sétány 1/A, H-1117 Budapest, Hungary

<sup>d</sup> MTA-ELTE Complex Chemical Systems Research Group, P.O. Box 32, H-1518 Budapest 112, Hungary

<sup>e</sup> Canadian Light Source Far-Infrared Beamline, 44 Innovation Blvd, Saskatoon, SK S7N 2V3, Canada

<sup>#</sup> Authors with equal contribution

<sup>\*</sup> Corresponding author

Email: [chenzq@lzu.edu.cn](mailto:chenzq@lzu.edu.cn)

Phone: +86-931-8912589

Fax: +86-931-8912585

The following content is included as the Electronic Supplementary Information of this publication:

Table S1: Anharmonic (VPT2) vibrational energy levels and vibrationally-averaged rotational constants with excitations in the out-of-plane and torsional modes of benzaldehyde in  $\text{cm}^{-1}$ .

... 1

Table S2: The torsional energy levels (in  $\text{cm}^{-1}$ ) and symmetry of benzaldehyde from the ground state quasiadiabatic channel calculation.

... 2

Table S3: The summary of assigned transitions of benzaldehyde.

... 2

Table S4: Reproduced barrier heights with different values of wavenumber shifts due to the possible Fermi resonance between the second torsional overtone and the in-plane bending mode (in  $\text{cm}^{-1}$ ).

... 3

Table S5: The observed, calculated frequencies and (obs.-cal.) error (in  $\text{cm}^{-1}$ ) of our reported transitions in the ground state and  $\nu_t = 1$  torsional state of benzaldehyde (the table is lined in the order of the observed frequency, lower states ", upper states ').

... 4

**Table S1** Anharmonic (VPT2) vibrational energy levels and vibrationally-averaged rotational constants with excitations in the out-of-plane and torsional modes of benzaldehyde in  $\text{cm}^{-1}$ .

| $V_{\text{oop}}$ | $V_{\text{tor}}$ | $E / (hc \text{ cm}^{-1})$ | $A / \text{cm}^{-1}$ | $B / \text{cm}^{-1}$ | $C / \text{cm}^{-1}$ |
|------------------|------------------|----------------------------|----------------------|----------------------|----------------------|
| 0                | 0                | 0                          | 0.173908             | 0.052006             | 0.040040             |
| 0                | 1                | 109.13                     | 0.173667             | 0.051993             | 0.040106             |
| 1                | 0                | 226.34                     | 0.174651             | 0.052000             | 0.040058             |
| 0                | 2                | 217.55                     | 0.173426             | 0.051981             | 0.040172             |
| 1                | 1                | 334.57                     | 0.174410             | 0.051987             | 0.040124             |
| 2                | 0                | 451.38                     | 0.175394             | 0.051994             | 0.040076             |
| 0                | 3                | 325.25                     | 0.173185             | 0.051968             | 0.040238             |
| 1                | 2                | 442.09                     | 0.174169             | 0.051975             | 0.040190             |
| 2                | 1                | 558.70                     | 0.175153             | 0.051981             | 0.040142             |
| 3                | 0                | 675.11                     | 0.176137             | 0.051988             | 0.040093             |
| 0                | 4                | 432.24                     | 0.172944             | 0.051955             | 0.040304             |
| 1                | 3                | 548.88                     | 0.173928             | 0.051962             | 0.040256             |
| 2                | 2                | 665.32                     | 0.174912             | 0.051969             | 0.040207             |
| 3                | 1                | 781.53                     | 0.175896             | 0.051976             | 0.040159             |
| 4                | 0                | 897.53                     | 0.176880             | 0.051982             | 0.040111             |
| 0                | 5                | 538.51                     | 0.172703             | 0.051943             | 0.040370             |
| 1                | 4                | 654.97                     | 0.173687             | 0.051949             | 0.040321             |
| 2                | 3                | 771.21                     | 0.174671             | 0.051956             | 0.040273             |
| 3                | 2                | 887.24                     | 0.175655             | 0.051963             | 0.040225             |
| 4                | 1                | 1003.05                    | 0.176639             | 0.051970             | 0.040177             |
| 5                | 0                | 1118.65                    | 0.177623             | 0.051977             | 0.040129             |

**Table S2** The torsional energy levels (in  $\text{cm}^{-1}$ ) and symmetry of benzaldehyde from the ground-state quasiadiabatic channel calculation.

| $v_{\text{tors}}$ | Symmetry | $E / (hc \text{ cm}^{-1})$ |
|-------------------|----------|----------------------------|
| 0                 | +        | 0                          |
| 0                 | -        | 0                          |
| 1                 | +        | 146.84                     |
| 1                 | -        | 146.84                     |
| 2                 | +        | 283.75                     |
| 2                 | -        | 283.75                     |
| 3                 | +        | 425.72                     |
| 3                 | -        | 425.72                     |
| 4                 | +        | 561.36                     |
| 4                 | -        | 561.36                     |
| 5                 | +        | 698.57                     |
| 5                 | -        | 698.57                     |

**Table S3** The summary of assigned transitions of benzaldehyde.

|          | $N_{\text{lines}}$ | $J$   | $K_a$ | $K_c$ |
|----------|--------------------|-------|-------|-------|
| GSCD     | 74                 | 18-43 | 12-38 | 0-27  |
| Q branch | 143                | 23-99 | 0-1   | 23-99 |
| R branch | 232                | 11-64 | 7-45  | 0-36  |
| P branch | 82                 | 20-63 | 13-38 | 0-35  |
| Total    | 457                | 11-99 | 0-45  | 0-99  |

**Table S4** Reproduced barrier heights with different values of wavenumber shifts due to the possible Fermi resonance between the second torsional overtone and the in-plane bending mode (in  $\text{cm}^{-1}$ ). This reproduction is based on the assumption that only the  $\nu_t = 2$  state is perturbed so that  $\nu_t = 2 \leftarrow \nu_t = 1 + \nu_t = 3 \leftarrow \nu_t = 2 = 213.19 \text{ cm}^{-1}$  as illustrated in the figure attached below.

| Shifted value | $\nu_t = 2 \leftarrow \nu_t = 1$ | $\nu_t = 3 \leftarrow \nu_t = 2$ | $V_2$  | $V_4$ | $V_6$ | Barrier |
|---------------|----------------------------------|----------------------------------|--------|-------|-------|---------|
| 0             | 107.58                           | 105.61                           | 1530.6 | 21.7  | 3.0   | 1533.6  |
| 0.1           | 107.48                           | 105.71                           | 1840   | -120  | 30    | 1870    |
| 0.2           | 107.38                           | 105.81                           | 2220   | -290  | 70    | 2290    |
| 0.3           | 107.28                           | 105.91                           | 2550   | -450  | 100   | 2650    |
| 0.4           | 107.18                           | 106.01                           | 2910   | -610  | 140   | 3050    |

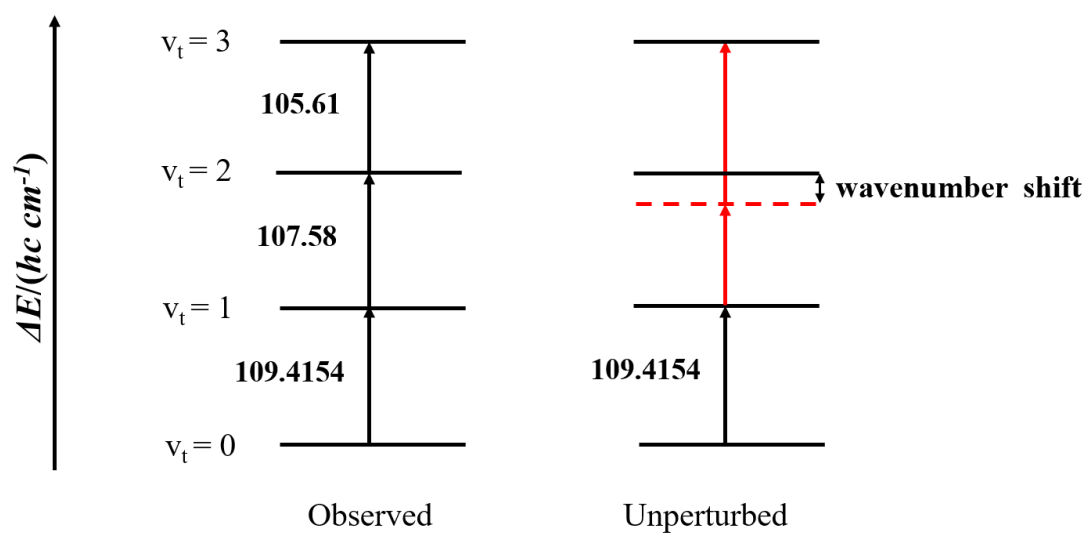

**Table S5** The observed, calculated frequencies and (obs.-cal.) error (in  $\text{cm}^{-1}$ ) of our reported transitions in the ground state and  $v_t = 1$  torsional state of benzaldehyde (the table is lined in the order of the observed frequency, lower states ", upper states ').

| $J'$ | $K_a'$ | $K_c'$ | $v$ | $J''$ | $K_a''$ | $K_c''$ | $v$ | $\nu_{\text{obs.}}$ | $\nu_{\text{cal.}}$ | $\nu_{\text{obs.}} - \nu_{\text{cal.}}$ |
|------|--------|--------|-----|-------|---------|---------|-----|---------------------|---------------------|-----------------------------------------|
| 62   | 32     | 31     | 1   | 63    | 33      | 31      | 0   | 94.65165            | 94.65184            | -0.00019                                |
| 62   | 32     | 30     | 1   | 63    | 33      | 30      | 0   | 94.65165            | 94.65184            | -0.00019                                |
| 42   | 37     | 6      | 1   | 43    | 38      | 6       | 0   | 94.87419            | 94.87431            | -0.00013                                |
| 42   | 37     | 5      | 1   | 43    | 38      | 5       | 0   | 94.87419            | 94.87431            | -0.00013                                |
| 41   | 37     | 5      | 1   | 42    | 38      | 5       | 0   | 94.96340            | 94.96339            | 0.00001                                 |
| 41   | 37     | 4      | 1   | 42    | 38      | 4       | 0   | 94.96340            | 94.96339            | 0.00001                                 |
| 39   | 37     | 2      | 1   | 40    | 38      | 2       | 0   | 95.14176            | 95.14181            | -0.00005                                |
| 39   | 37     | 3      | 1   | 40    | 38      | 3       | 0   | 95.14176            | 95.14181            | -0.00005                                |
| 42   | 36     | 6      | 1   | 43    | 37      | 6       | 0   | 95.18455            | 95.18444            | 0.00011                                 |
| 42   | 36     | 7      | 1   | 43    | 37      | 7       | 0   | 95.18455            | 95.18444            | 0.00011                                 |
| 38   | 36     | 3      | 1   | 39    | 37      | 3       | 0   | 95.54121            | 95.54128            | -0.00007                                |
| 38   | 36     | 2      | 1   | 39    | 37      | 2       | 0   | 95.54121            | 95.54128            | -0.00007                                |
| 38   | 31     | 8      | 1   | 39    | 32      | 8       | 0   | 97.07062            | 97.07049            | 0.00013                                 |
| 38   | 31     | 7      | 1   | 39    | 32      | 7       | 0   | 97.07062            | 97.07049            | 0.00013                                 |
| 35   | 31     | 4      | 1   | 36    | 32      | 4       | 0   | 97.33898            | 97.33901            | -0.00003                                |
| 35   | 31     | 5      | 1   | 36    | 32      | 5       | 0   | 97.33898            | 97.33901            | -0.00003                                |
| 36   | 30     | 6      | 1   | 37    | 31      | 6       | 0   | 97.55088            | 97.55095            | -0.00007                                |
| 36   | 30     | 7      | 1   | 37    | 31      | 7       | 0   | 97.55088            | 97.55095            | -0.00007                                |
| 57   | 23     | 35     | 1   | 58    | 24      | 35      | 0   | 97.77649            | 97.77652            | -0.00003                                |
| 57   | 23     | 34     | 1   | 58    | 24      | 34      | 0   | 97.77649            | 97.77652            | -0.00003                                |
| 28   | 28     | 0      | 1   | 29    | 29      | 0       | 0   | 98.86900            | 98.86888            | 0.00011                                 |
| 28   | 28     | 1      | 1   | 29    | 29      | 1       | 0   | 98.86900            | 98.86888            | 0.00011                                 |
| 34   | 26     | 8      | 1   | 35    | 27      | 8       | 0   | 98.92173            | 98.92193            | -0.00020                                |
| 34   | 26     | 9      | 1   | 35    | 27      | 9       | 0   | 98.92173            | 98.92193            | -0.00020                                |
| 27   | 27     | 0      | 1   | 28    | 28      | 0       | 0   | 99.25632            | 99.25636            | -0.00004                                |
| 27   | 27     | 1      | 1   | 28    | 28      | 1       | 0   | 99.25632            | 99.25636            | -0.00004                                |
| 27   | 26     | 2      | 1   | 28    | 27      | 2       | 0   | 99.55219            | 99.55209            | 0.00009                                 |
| 27   | 26     | 1      | 1   | 28    | 27      | 1       | 0   | 99.55219            | 99.55209            | 0.00009                                 |
| 32   | 23     | 10     | 1   | 33    | 24      | 10      | 0   | 99.98022            | 99.98013            | 0.00009                                 |
| 32   | 23     | 9      | 1   | 33    | 24      | 9       | 0   | 99.98022            | 99.98013            | 0.00009                                 |
| 31   | 23     | 9      | 1   | 32    | 24      | 9       | 0   | 100.07013           | 100.07002           | 0.00011                                 |
| 31   | 23     | 8      | 1   | 32    | 24      | 8       | 0   | 100.07013           | 100.07002           | 0.00011                                 |
| 38   | 19     | 20     | 1   | 39    | 20      | 20      | 0   | 100.59683           | 100.59667           | 0.00017                                 |
| 38   | 19     | 19     | 1   | 39    | 20      | 19      | 0   | 100.59683           | 100.59667           | 0.00017                                 |
| 42   | 16     | 26     | 1   | 43    | 17      | 26      | 0   | 101.10089           | 101.10094           | -0.00006                                |
| 42   | 16     | 27     | 1   | 43    | 17      | 27      | 0   | 101.10089           | 101.10094           | -0.00006                                |
| 25   | 21     | 4      | 1   | 26    | 22      | 4       | 0   | 101.18967           | 101.18974           | -0.00006                                |
| 25   | 21     | 5      | 1   | 26    | 22      | 5       | 0   | 101.18967           | 101.18974           | -0.00006                                |

---

|    |    |    |   |    |    |    |   |           |           |          |
|----|----|----|---|----|----|----|---|-----------|-----------|----------|
| 28 | 20 | 9  | 1 | 29 | 21 | 9  | 0 | 101.20599 | 101.20575 | 0.00024  |
| 28 | 20 | 8  | 1 | 29 | 21 | 8  | 0 | 101.20599 | 101.20575 | 0.00024  |
| 29 | 19 | 11 | 1 | 30 | 20 | 11 | 0 | 101.40127 | 101.40131 | -0.00004 |
| 29 | 19 | 10 | 1 | 30 | 20 | 10 | 0 | 101.40127 | 101.40131 | -0.00004 |
| 23 | 20 | 4  | 1 | 24 | 21 | 4  | 0 | 101.65790 | 101.65788 | 0.00002  |
| 23 | 20 | 3  | 1 | 24 | 21 | 3  | 0 | 101.65790 | 101.65788 | 0.00002  |
| 35 | 16 | 19 | 1 | 36 | 17 | 19 | 0 | 101.71515 | 101.71498 | 0.00017  |
| 35 | 16 | 20 | 1 | 36 | 17 | 20 | 0 | 101.71515 | 101.71498 | 0.00017  |
| 39 | 14 | 25 | 1 | 40 | 15 | 25 | 0 | 101.93016 | 101.93020 | -0.00004 |
| 39 | 14 | 26 | 1 | 40 | 15 | 26 | 0 | 101.93016 | 101.93020 | -0.00004 |
| 20 | 20 | 0  | 1 | 21 | 21 | 0  | 0 | 101.93016 | 101.93029 | -0.00013 |
| 20 | 20 | 1  | 1 | 21 | 21 | 1  | 0 | 101.93016 | 101.93029 | -0.00013 |
| 26 | 18 | 8  | 1 | 27 | 19 | 8  | 0 | 101.95610 | 101.95601 | 0.00009  |
| 26 | 18 | 9  | 1 | 27 | 19 | 9  | 0 | 101.95610 | 101.95601 | 0.00009  |
| 21 | 19 | 3  | 1 | 22 | 20 | 3  | 0 | 102.12481 | 102.12490 | -0.00009 |
| 21 | 19 | 2  | 1 | 22 | 20 | 2  | 0 | 102.12481 | 102.12490 | -0.00009 |
| 37 | 13 | 24 | 1 | 38 | 14 | 24 | 0 | 102.38673 | 102.38668 | 0.00004  |
| 37 | 13 | 25 | 1 | 38 | 14 | 25 | 0 | 102.38673 | 102.38668 | 0.00004  |
| 24 | 17 | 7  | 1 | 25 | 18 | 7  | 0 | 102.41959 | 102.41952 | 0.00006  |
| 24 | 17 | 8  | 1 | 25 | 18 | 8  | 0 | 102.41959 | 102.41952 | 0.00006  |
| 36 | 13 | 23 | 1 | 37 | 14 | 23 | 0 | 102.47310 | 102.47309 | 0.00001  |
| 36 | 13 | 24 | 1 | 37 | 14 | 24 | 0 | 102.47310 | 102.47309 | 0.00001  |
| 19 | 18 | 2  | 1 | 20 | 19 | 2  | 0 | 102.59072 | 102.59079 | -0.00007 |
| 19 | 18 | 1  | 1 | 20 | 19 | 1  | 0 | 102.59072 | 102.59079 | -0.00007 |
| 25 | 16 | 10 | 1 | 26 | 17 | 10 | 0 | 102.61016 | 102.61037 | -0.00022 |
| 25 | 16 | 9  | 1 | 26 | 17 | 9  | 0 | 102.61016 | 102.61037 | -0.00022 |
| 33 | 13 | 20 | 1 | 34 | 14 | 20 | 0 | 102.73493 | 102.73477 | 0.00015  |
| 33 | 13 | 21 | 1 | 34 | 14 | 21 | 0 | 102.73493 | 102.73477 | 0.00015  |
| 36 | 12 | 24 | 1 | 37 | 13 | 24 | 0 | 102.75642 | 102.75659 | -0.00017 |
| 36 | 12 | 25 | 1 | 37 | 13 | 25 | 0 | 102.75642 | 102.75657 | -0.00015 |
| 20 | 17 | 3  | 1 | 21 | 18 | 3  | 0 | 102.78251 | 102.78239 | 0.00012  |
| 20 | 17 | 4  | 1 | 21 | 18 | 4  | 0 | 102.78251 | 102.78239 | 0.00012  |
| 29 | 14 | 15 | 1 | 30 | 15 | 15 | 0 | 102.81011 | 102.80999 | 0.00011  |
| 29 | 14 | 16 | 1 | 30 | 15 | 16 | 0 | 102.81011 | 102.80999 | 0.00011  |
| 32 | 13 | 19 | 1 | 33 | 14 | 19 | 0 | 102.82261 | 102.82273 | -0.00012 |
| 32 | 13 | 20 | 1 | 33 | 14 | 20 | 0 | 102.82261 | 102.82273 | -0.00012 |
| 35 | 12 | 23 | 1 | 36 | 13 | 23 | 0 | 102.84244 | 102.84231 | 0.00013  |
| 35 | 12 | 24 | 1 | 36 | 13 | 24 | 0 | 102.84244 | 102.84231 | 0.00013  |
| 30 | 13 | 17 | 1 | 31 | 14 | 17 | 0 | 102.99962 | 102.99960 | 0.00002  |
| 30 | 13 | 18 | 1 | 31 | 14 | 18 | 0 | 102.99962 | 102.99960 | 0.00002  |
| 24 | 14 | 10 | 1 | 25 | 15 | 10 | 0 | 103.25933 | 103.25915 | 0.00018  |
| 24 | 14 | 11 | 1 | 25 | 15 | 11 | 0 | 103.25933 | 103.25915 | 0.00018  |
| 20 | 14 | 6  | 1 | 21 | 15 | 6  | 0 | 103.62128 | 103.62140 | -0.00012 |
| 20 | 14 | 7  | 1 | 21 | 15 | 7  | 0 | 103.62128 | 103.62140 | -0.00012 |

---

|    |   |    |   |    |   |    |   |           |           |          |
|----|---|----|---|----|---|----|---|-----------|-----------|----------|
| 23 | 0 | 23 | 1 | 23 | 1 | 23 | 0 | 109.44480 | 109.44475 | 0.00005  |
| 23 | 1 | 23 | 1 | 23 | 0 | 23 | 0 | 109.44480 | 109.44477 | 0.00003  |
| 24 | 0 | 24 | 1 | 24 | 1 | 24 | 0 | 109.44733 | 109.44747 | -0.00014 |
| 24 | 1 | 24 | 1 | 24 | 0 | 24 | 0 | 109.44733 | 109.44749 | -0.00016 |
| 25 | 0 | 25 | 1 | 25 | 1 | 25 | 0 | 109.45036 | 109.45032 | 0.00005  |
| 25 | 1 | 25 | 1 | 25 | 0 | 25 | 0 | 109.45036 | 109.45032 | 0.00004  |
| 26 | 0 | 26 | 1 | 26 | 1 | 26 | 0 | 109.45325 | 109.45328 | -0.00003 |
| 26 | 1 | 26 | 1 | 26 | 0 | 26 | 0 | 109.45325 | 109.45328 | -0.00003 |
| 28 | 0 | 28 | 1 | 28 | 1 | 28 | 0 | 109.45948 | 109.45956 | -0.00008 |
| 28 | 1 | 28 | 1 | 28 | 0 | 28 | 0 | 109.45948 | 109.45956 | -0.00008 |
| 29 | 0 | 29 | 1 | 29 | 1 | 29 | 0 | 109.46291 | 109.46288 | 0.00002  |
| 29 | 1 | 29 | 1 | 29 | 0 | 29 | 0 | 109.46291 | 109.46288 | 0.00002  |
| 31 | 0 | 31 | 1 | 31 | 1 | 31 | 0 | 109.46974 | 109.46989 | -0.00015 |
| 31 | 1 | 31 | 1 | 31 | 0 | 31 | 0 | 109.46974 | 109.46989 | -0.00015 |
| 35 | 0 | 35 | 1 | 35 | 1 | 35 | 0 | 109.48530 | 109.48534 | -0.00004 |
| 35 | 1 | 35 | 1 | 35 | 0 | 35 | 0 | 109.48530 | 109.48534 | -0.00004 |
| 36 | 0 | 36 | 1 | 36 | 1 | 36 | 0 | 109.48937 | 109.48951 | -0.00014 |
| 36 | 1 | 36 | 1 | 36 | 0 | 36 | 0 | 109.48937 | 109.48951 | -0.00014 |
| 37 | 0 | 37 | 1 | 37 | 1 | 37 | 0 | 109.49366 | 109.49379 | -0.00013 |
| 37 | 1 | 37 | 1 | 37 | 0 | 37 | 0 | 109.49366 | 109.49379 | -0.00013 |
| 38 | 0 | 38 | 1 | 38 | 1 | 38 | 0 | 109.49817 | 109.49820 | -0.00003 |
| 38 | 1 | 38 | 1 | 38 | 0 | 38 | 0 | 109.49817 | 109.49820 | -0.00003 |
| 39 | 0 | 39 | 1 | 39 | 1 | 39 | 0 | 109.50264 | 109.50273 | -0.00008 |
| 39 | 1 | 39 | 1 | 39 | 0 | 39 | 0 | 109.50264 | 109.50273 | -0.00008 |
| 40 | 0 | 40 | 1 | 40 | 1 | 40 | 0 | 109.50719 | 109.50737 | -0.00018 |
| 40 | 1 | 40 | 1 | 40 | 0 | 40 | 0 | 109.50719 | 109.50737 | -0.00018 |
| 41 | 0 | 41 | 1 | 41 | 1 | 41 | 0 | 109.51221 | 109.51214 | 0.00007  |
| 41 | 1 | 41 | 1 | 41 | 0 | 41 | 0 | 109.51221 | 109.51214 | 0.00007  |
| 42 | 0 | 42 | 1 | 42 | 1 | 42 | 0 | 109.51705 | 109.51703 | 0.00002  |
| 42 | 1 | 42 | 1 | 42 | 0 | 42 | 0 | 109.51705 | 109.51703 | 0.00002  |
| 43 | 0 | 43 | 1 | 43 | 1 | 43 | 0 | 109.52195 | 109.52203 | -0.00008 |
| 43 | 1 | 43 | 1 | 43 | 0 | 43 | 0 | 109.52195 | 109.52203 | -0.00008 |
| 44 | 0 | 44 | 1 | 44 | 1 | 44 | 0 | 109.52705 | 109.52716 | -0.00012 |
| 44 | 1 | 44 | 1 | 44 | 0 | 44 | 0 | 109.52705 | 109.52716 | -0.00012 |
| 45 | 0 | 45 | 1 | 45 | 1 | 45 | 0 | 109.53240 | 109.53241 | -0.00001 |
| 45 | 1 | 45 | 1 | 45 | 0 | 45 | 0 | 109.53240 | 109.53241 | -0.00001 |
| 46 | 0 | 46 | 1 | 46 | 1 | 46 | 0 | 109.53774 | 109.53778 | -0.00004 |
| 46 | 1 | 46 | 1 | 46 | 0 | 46 | 0 | 109.53774 | 109.53778 | -0.00004 |
| 47 | 0 | 47 | 1 | 47 | 1 | 47 | 0 | 109.54317 | 109.54327 | -0.00010 |
| 47 | 1 | 47 | 1 | 47 | 0 | 47 | 0 | 109.54317 | 109.54327 | -0.00010 |
| 48 | 0 | 48 | 1 | 48 | 1 | 48 | 0 | 109.54898 | 109.54887 | 0.00010  |
| 48 | 1 | 48 | 1 | 48 | 0 | 48 | 0 | 109.54898 | 109.54887 | 0.00010  |
| 49 | 0 | 49 | 1 | 49 | 1 | 49 | 0 | 109.55455 | 109.55460 | -0.00005 |
| 49 | 1 | 49 | 1 | 49 | 0 | 49 | 0 | 109.55455 | 109.55460 | -0.00005 |

|    |   |    |   |    |   |    |   |           |           |          |
|----|---|----|---|----|---|----|---|-----------|-----------|----------|
| 50 | 0 | 50 | 1 | 50 | 1 | 50 | 0 | 109.56045 | 109.56045 | 0.00000  |
| 50 | 1 | 50 | 1 | 50 | 0 | 50 | 0 | 109.56045 | 109.56045 | 0.00000  |
| 51 | 0 | 51 | 1 | 51 | 1 | 51 | 0 | 109.56648 | 109.56642 | 0.00006  |
| 51 | 1 | 51 | 1 | 51 | 0 | 51 | 0 | 109.56648 | 109.56642 | 0.00006  |
| 52 | 0 | 52 | 1 | 52 | 1 | 52 | 0 | 109.57239 | 109.57251 | -0.00012 |
| 52 | 1 | 52 | 1 | 52 | 0 | 52 | 0 | 109.57239 | 109.57251 | -0.00012 |
| 53 | 0 | 53 | 1 | 53 | 1 | 53 | 0 | 109.57866 | 109.57872 | -0.00006 |
| 53 | 1 | 53 | 1 | 53 | 0 | 53 | 0 | 109.57866 | 109.57872 | -0.00006 |
| 54 | 0 | 54 | 1 | 54 | 1 | 54 | 0 | 109.58507 | 109.58505 | 0.00002  |
| 54 | 1 | 54 | 1 | 54 | 0 | 54 | 0 | 109.58507 | 109.58505 | 0.00002  |
| 55 | 0 | 55 | 1 | 55 | 1 | 55 | 0 | 109.59149 | 109.59149 | 0.00000  |
| 55 | 1 | 55 | 1 | 55 | 0 | 55 | 0 | 109.59149 | 109.59149 | 0.00000  |
| 56 | 0 | 56 | 1 | 56 | 1 | 56 | 0 | 109.59802 | 109.59806 | -0.00004 |
| 56 | 1 | 56 | 1 | 56 | 0 | 56 | 0 | 109.59802 | 109.59806 | -0.00004 |
| 57 | 0 | 57 | 1 | 57 | 1 | 57 | 0 | 109.60474 | 109.60475 | 0.00000  |
| 57 | 1 | 57 | 1 | 57 | 0 | 57 | 0 | 109.60474 | 109.60475 | 0.00000  |
| 58 | 0 | 58 | 1 | 58 | 1 | 58 | 0 | 109.61158 | 109.61156 | 0.00003  |
| 58 | 1 | 58 | 1 | 58 | 0 | 58 | 0 | 109.61158 | 109.61156 | 0.00003  |
| 59 | 0 | 59 | 1 | 59 | 1 | 59 | 0 | 109.61833 | 109.61848 | -0.00016 |
| 59 | 1 | 59 | 1 | 59 | 0 | 59 | 0 | 109.61833 | 109.61848 | -0.00016 |
| 60 | 1 | 60 | 1 | 60 | 0 | 60 | 0 | 109.62561 | 109.62553 | 0.00008  |
| 60 | 0 | 60 | 1 | 60 | 1 | 60 | 0 | 109.62561 | 109.62553 | 0.00008  |
| 61 | 1 | 61 | 1 | 61 | 0 | 61 | 0 | 109.63275 | 109.63270 | 0.00005  |
| 61 | 0 | 61 | 1 | 61 | 1 | 61 | 0 | 109.63275 | 109.63270 | 0.00005  |
| 62 | 0 | 62 | 1 | 62 | 1 | 62 | 0 | 109.63997 | 109.63999 | -0.00002 |
| 62 | 1 | 62 | 1 | 62 | 0 | 62 | 0 | 109.63997 | 109.63999 | -0.00002 |
| 63 | 0 | 63 | 1 | 63 | 1 | 63 | 0 | 109.64745 | 109.64739 | 0.00006  |
| 63 | 1 | 63 | 1 | 63 | 0 | 63 | 0 | 109.64745 | 109.64739 | 0.00006  |
| 64 | 0 | 64 | 1 | 64 | 1 | 64 | 0 | 109.65498 | 109.65492 | 0.00006  |
| 64 | 1 | 64 | 1 | 64 | 0 | 64 | 0 | 109.65498 | 109.65492 | 0.00006  |
| 65 | 0 | 65 | 1 | 65 | 1 | 65 | 0 | 109.66265 | 109.66256 | 0.00009  |
| 65 | 1 | 65 | 1 | 65 | 0 | 65 | 0 | 109.66265 | 109.66256 | 0.00009  |
| 66 | 1 | 66 | 1 | 66 | 0 | 66 | 0 | 109.67038 | 109.67033 | 0.00005  |
| 66 | 0 | 66 | 1 | 66 | 1 | 66 | 0 | 109.67038 | 109.67033 | 0.00005  |
| 67 | 1 | 67 | 1 | 67 | 0 | 67 | 0 | 109.67827 | 109.67821 | 0.00005  |
| 67 | 0 | 67 | 1 | 67 | 1 | 67 | 0 | 109.67827 | 109.67821 | 0.00005  |
| 68 | 1 | 68 | 1 | 68 | 0 | 68 | 0 | 109.68641 | 109.68621 | 0.00020  |
| 68 | 0 | 68 | 1 | 68 | 1 | 68 | 0 | 109.68641 | 109.68621 | 0.00020  |
| 69 | 0 | 69 | 1 | 69 | 1 | 69 | 0 | 109.69417 | 109.69434 | -0.00016 |
| 69 | 1 | 69 | 1 | 69 | 0 | 69 | 0 | 109.69417 | 109.69434 | -0.00016 |
| 70 | 1 | 70 | 1 | 70 | 0 | 70 | 0 | 109.70272 | 109.70258 | 0.00014  |
| 70 | 0 | 70 | 1 | 70 | 1 | 70 | 0 | 109.70272 | 109.70258 | 0.00014  |
| 71 | 0 | 71 | 1 | 71 | 1 | 71 | 0 | 109.71110 | 109.71094 | 0.00016  |
| 71 | 1 | 71 | 1 | 71 | 0 | 71 | 0 | 109.71110 | 109.71094 | 0.00016  |



|    |   |    |   |    |   |    |   |           |           |          |
|----|---|----|---|----|---|----|---|-----------|-----------|----------|
| 72 | 0 | 72 | 1 | 72 | 1 | 72 | 0 | 109.71947 | 109.71942 | 0.00005  |
| 72 | 1 | 72 | 1 | 72 | 0 | 72 | 0 | 109.71947 | 109.71942 | 0.00005  |
| 73 | 1 | 73 | 1 | 73 | 0 | 73 | 0 | 109.72807 | 109.72802 | 0.00005  |
| 73 | 0 | 73 | 1 | 73 | 1 | 73 | 0 | 109.72807 | 109.72802 | 0.00005  |
| 74 | 0 | 74 | 1 | 74 | 1 | 74 | 0 | 109.73678 | 109.73674 | 0.00004  |
| 74 | 1 | 74 | 1 | 74 | 0 | 74 | 0 | 109.73678 | 109.73674 | 0.00004  |
| 75 | 1 | 75 | 1 | 75 | 0 | 75 | 0 | 109.74555 | 109.74558 | -0.00003 |
| 75 | 0 | 75 | 1 | 75 | 1 | 75 | 0 | 109.74555 | 109.74558 | -0.00003 |
| 76 | 1 | 76 | 1 | 76 | 0 | 76 | 0 | 109.75466 | 109.75454 | 0.00013  |
| 76 | 0 | 76 | 1 | 76 | 1 | 76 | 0 | 109.75466 | 109.75454 | 0.00013  |
| 77 | 1 | 77 | 1 | 77 | 0 | 77 | 0 | 109.76366 | 109.76361 | 0.00004  |
| 77 | 0 | 77 | 1 | 77 | 1 | 77 | 0 | 109.76366 | 109.76361 | 0.00004  |
| 78 | 0 | 78 | 1 | 78 | 1 | 78 | 0 | 109.77278 | 109.77281 | -0.00003 |
| 78 | 1 | 78 | 1 | 78 | 0 | 78 | 0 | 109.77278 | 109.77281 | -0.00003 |
| 79 | 1 | 79 | 1 | 79 | 0 | 79 | 0 | 109.78225 | 109.78212 | 0.00013  |
| 79 | 0 | 79 | 1 | 79 | 1 | 79 | 0 | 109.78225 | 109.78212 | 0.00013  |
| 80 | 1 | 80 | 1 | 80 | 0 | 80 | 0 | 109.79163 | 109.79155 | 0.00007  |
| 80 | 0 | 80 | 1 | 80 | 1 | 80 | 0 | 109.79163 | 109.79155 | 0.00007  |
| 81 | 1 | 81 | 1 | 81 | 0 | 81 | 0 | 109.80105 | 109.80110 | -0.00005 |
| 81 | 0 | 81 | 1 | 81 | 1 | 81 | 0 | 109.80105 | 109.80110 | -0.00005 |
| 82 | 0 | 82 | 1 | 82 | 1 | 82 | 0 | 109.81081 | 109.81078 | 0.00004  |
| 82 | 1 | 82 | 1 | 82 | 0 | 82 | 0 | 109.81081 | 109.81078 | 0.00004  |
| 83 | 0 | 83 | 1 | 83 | 1 | 83 | 0 | 109.82049 | 109.82056 | -0.00007 |
| 83 | 1 | 83 | 1 | 83 | 0 | 83 | 0 | 109.82049 | 109.82056 | -0.00007 |
| 84 | 1 | 84 | 1 | 84 | 0 | 84 | 0 | 109.83029 | 109.83047 | -0.00018 |
| 84 | 0 | 84 | 1 | 84 | 1 | 84 | 0 | 109.83029 | 109.83047 | -0.00018 |
| 85 | 1 | 85 | 1 | 85 | 0 | 85 | 0 | 109.84040 | 109.84050 | -0.00010 |
| 85 | 0 | 85 | 1 | 85 | 1 | 85 | 0 | 109.84040 | 109.84050 | -0.00010 |
| 86 | 1 | 86 | 1 | 86 | 0 | 86 | 0 | 109.85047 | 109.85064 | -0.00017 |
| 86 | 0 | 86 | 1 | 86 | 1 | 86 | 0 | 109.85047 | 109.85064 | -0.00017 |
| 87 | 0 | 87 | 1 | 87 | 1 | 87 | 0 | 109.86093 | 109.86091 | 0.00002  |
| 87 | 1 | 87 | 1 | 87 | 0 | 87 | 0 | 109.86093 | 109.86091 | 0.00002  |
| 88 | 1 | 88 | 1 | 88 | 0 | 88 | 0 | 109.87120 | 109.87129 | -0.00008 |
| 88 | 0 | 88 | 1 | 88 | 1 | 88 | 0 | 109.87120 | 109.87129 | -0.00008 |
| 89 | 0 | 89 | 1 | 89 | 1 | 89 | 0 | 109.88172 | 109.88179 | -0.00007 |
| 89 | 1 | 89 | 1 | 89 | 0 | 89 | 0 | 109.88172 | 109.88179 | -0.00007 |
| 90 | 0 | 90 | 1 | 90 | 1 | 90 | 0 | 109.89235 | 109.89241 | -0.00006 |
| 90 | 1 | 90 | 1 | 90 | 0 | 90 | 0 | 109.89235 | 109.89241 | -0.00006 |
| 92 | 0 | 92 | 1 | 92 | 1 | 92 | 0 | 109.91393 | 109.91400 | -0.00007 |
| 92 | 1 | 92 | 1 | 92 | 0 | 92 | 0 | 109.91393 | 109.91400 | -0.00007 |
| 94 | 1 | 94 | 1 | 94 | 0 | 94 | 0 | 109.93622 | 109.93606 | 0.00016  |
| 94 | 0 | 94 | 1 | 94 | 1 | 94 | 0 | 109.93622 | 109.93606 | 0.00016  |
| 95 | 1 | 95 | 1 | 95 | 0 | 95 | 0 | 109.94726 | 109.94727 | -0.00001 |
| 95 | 0 | 95 | 1 | 95 | 1 | 95 | 0 | 109.94726 | 109.94727 | -0.00001 |

|    |    |    |   |    |    |    |   |           |           |          |
|----|----|----|---|----|----|----|---|-----------|-----------|----------|
| 96 | 1  | 96 | 1 | 96 | 0  | 96 | 0 | 109.95874 | 109.95860 | 0.00014  |
| 96 | 0  | 96 | 1 | 96 | 1  | 96 | 0 | 109.95874 | 109.95860 | 0.00014  |
| 97 | 0  | 97 | 1 | 97 | 1  | 97 | 0 | 109.96995 | 109.97004 | -0.00010 |
| 97 | 1  | 97 | 1 | 97 | 0  | 97 | 0 | 109.96995 | 109.97004 | -0.00010 |
| 98 | 1  | 98 | 1 | 98 | 0  | 98 | 0 | 109.98171 | 109.98160 | 0.00011  |
| 98 | 0  | 98 | 1 | 98 | 1  | 98 | 0 | 109.98171 | 109.98160 | 0.00011  |
| 99 | 0  | 99 | 1 | 99 | 1  | 99 | 0 | 109.99324 | 109.99328 | -0.00005 |
| 99 | 1  | 99 | 1 | 99 | 0  | 99 | 0 | 109.99324 | 109.99328 | -0.00005 |
| 12 | 9  | 3  | 1 | 11 | 8  | 3  | 0 | 112.65355 | 112.65351 | 0.00005  |
| 12 | 9  | 4  | 1 | 11 | 8  | 4  | 0 | 112.65355 | 112.65351 | 0.00005  |
| 14 | 9  | 5  | 1 | 13 | 8  | 5  | 0 | 112.84080 | 112.84063 | 0.00017  |
| 14 | 9  | 6  | 1 | 13 | 8  | 6  | 0 | 112.84080 | 112.84063 | 0.00017  |
| 44 | 16 | 29 | 1 | 44 | 15 | 29 | 0 | 113.20525 | 113.20525 | 0.00000  |
| 42 | 16 | 27 | 1 | 42 | 15 | 27 | 0 | 113.21147 | 113.21148 | -0.00001 |
| 41 | 16 | 26 | 1 | 41 | 15 | 26 | 0 | 113.21402 | 113.21400 | 0.00002  |
| 18 | 12 | 6  | 1 | 17 | 11 | 6  | 0 | 113.93908 | 113.93914 | -0.00006 |
| 18 | 12 | 7  | 1 | 17 | 11 | 7  | 0 | 113.93908 | 113.93914 | -0.00006 |
| 21 | 11 | 10 | 1 | 20 | 10 | 10 | 0 | 113.98063 | 113.98064 | -0.00002 |
| 21 | 11 | 11 | 1 | 20 | 10 | 11 | 0 | 113.98063 | 113.98064 | -0.00002 |
| 24 | 10 | 14 | 1 | 23 | 9  | 14 | 0 | 114.01671 | 114.01664 | 0.00007  |
| 24 | 10 | 15 | 1 | 23 | 9  | 15 | 0 | 114.01671 | 114.01665 | 0.00006  |
| 23 | 11 | 12 | 1 | 22 | 10 | 12 | 0 | 114.16779 | 114.16770 | 0.00008  |
| 23 | 11 | 13 | 1 | 22 | 10 | 13 | 0 | 114.16779 | 114.16770 | 0.00008  |
| 24 | 11 | 13 | 1 | 23 | 10 | 13 | 0 | 114.26123 | 114.26103 | 0.00020  |
| 24 | 11 | 14 | 1 | 23 | 10 | 14 | 0 | 114.26123 | 114.26103 | 0.00020  |
| 19 | 13 | 6  | 1 | 18 | 12 | 6  | 0 | 114.27134 | 114.27123 | 0.00011  |
| 19 | 13 | 7  | 1 | 18 | 12 | 7  | 0 | 114.27134 | 114.27123 | 0.00011  |
| 26 | 11 | 15 | 1 | 25 | 10 | 15 | 0 | 114.44711 | 114.44711 | 0.00001  |
| 26 | 11 | 16 | 1 | 25 | 10 | 16 | 0 | 114.44711 | 114.44711 | 0.00000  |
| 19 | 14 | 6  | 1 | 18 | 13 | 6  | 0 | 114.50779 | 114.50774 | 0.00005  |
| 19 | 14 | 5  | 1 | 18 | 13 | 5  | 0 | 114.50779 | 114.50774 | 0.00005  |
| 22 | 13 | 9  | 1 | 21 | 12 | 9  | 0 | 114.55340 | 114.55347 | -0.00007 |
| 22 | 13 | 10 | 1 | 21 | 12 | 10 | 0 | 114.55340 | 114.55347 | -0.00007 |
| 26 | 12 | 14 | 1 | 25 | 11 | 14 | 0 | 114.68976 | 114.68967 | 0.00009  |
| 26 | 12 | 15 | 1 | 25 | 11 | 15 | 0 | 114.68976 | 114.68967 | 0.00009  |
| 16 | 16 | 0  | 1 | 15 | 15 | 0  | 0 | 114.69367 | 114.69380 | -0.00013 |
| 16 | 16 | 1  | 1 | 15 | 15 | 1  | 0 | 114.69367 | 114.69380 | -0.00013 |
| 21 | 14 | 7  | 1 | 20 | 13 | 7  | 0 | 114.69595 | 114.69607 | -0.00012 |
| 21 | 14 | 8  | 1 | 20 | 13 | 8  | 0 | 114.69595 | 114.69607 | -0.00012 |
| 27 | 12 | 15 | 1 | 26 | 11 | 15 | 0 | 114.78315 | 114.78307 | 0.00008  |
| 27 | 12 | 16 | 1 | 26 | 11 | 16 | 0 | 114.78315 | 114.78307 | 0.00008  |
| 25 | 13 | 12 | 1 | 24 | 12 | 12 | 0 | 114.83552 | 114.83558 | -0.00006 |
| 25 | 13 | 13 | 1 | 24 | 12 | 13 | 0 | 114.83552 | 114.83558 | -0.00006 |
| 20 | 15 | 5  | 1 | 19 | 14 | 5  | 0 | 114.83685 | 114.83687 | -0.00002 |

---

|    |    |    |   |    |    |    |   |           |           |          |
|----|----|----|---|----|----|----|---|-----------|-----------|----------|
| 20 | 15 | 6  | 1 | 19 | 14 | 6  | 0 | 114.83685 | 114.83687 | -0.00002 |
| 29 | 12 | 17 | 1 | 28 | 11 | 17 | 0 | 114.96923 | 114.96931 | -0.00008 |
| 29 | 12 | 18 | 1 | 28 | 11 | 18 | 0 | 114.96923 | 114.96931 | -0.00008 |
| 24 | 14 | 10 | 1 | 23 | 13 | 10 | 0 | 114.97888 | 114.97872 | 0.00016  |
| 24 | 14 | 11 | 1 | 23 | 13 | 11 | 0 | 114.97888 | 114.97872 | 0.00016  |
| 31 | 12 | 19 | 1 | 30 | 11 | 19 | 0 | 115.15448 | 115.15459 | -0.00011 |
| 31 | 12 | 20 | 1 | 30 | 11 | 20 | 0 | 115.15448 | 115.15460 | -0.00011 |
| 21 | 16 | 6  | 1 | 20 | 15 | 6  | 0 | 115.16460 | 115.16458 | 0.00002  |
| 21 | 16 | 5  | 1 | 20 | 15 | 5  | 0 | 115.16460 | 115.16458 | 0.00002  |
| 45 | 9  | 36 | 1 | 44 | 8  | 36 | 0 | 115.22727 | 115.22714 | 0.00014  |
| 44 | 8  | 36 | 1 | 43 | 7  | 36 | 0 | 115.22727 | 115.22728 | 0.00000  |
| 27 | 14 | 13 | 1 | 26 | 13 | 13 | 0 | 115.26135 | 115.26128 | 0.00008  |
| 27 | 14 | 14 | 1 | 26 | 13 | 14 | 0 | 115.26135 | 115.26128 | 0.00008  |
| 23 | 16 | 8  | 1 | 22 | 15 | 8  | 0 | 115.35331 | 115.35330 | 0.00001  |
| 23 | 16 | 7  | 1 | 22 | 15 | 7  | 0 | 115.35331 | 115.35330 | 0.00001  |
| 19 | 18 | 2  | 1 | 18 | 17 | 2  | 0 | 115.43830 | 115.43830 | -0.00001 |
| 19 | 18 | 1  | 1 | 18 | 17 | 1  | 0 | 115.43830 | 115.43830 | -0.00001 |
| 29 | 14 | 15 | 1 | 28 | 13 | 15 | 0 | 115.44951 | 115.44941 | 0.00010  |
| 29 | 14 | 16 | 1 | 28 | 13 | 16 | 0 | 115.44951 | 115.44941 | 0.00010  |
| 25 | 16 | 10 | 1 | 24 | 15 | 10 | 0 | 115.54213 | 115.54218 | -0.00005 |
| 25 | 16 | 9  | 1 | 24 | 15 | 9  | 0 | 115.54213 | 115.54218 | -0.00005 |
| 30 | 14 | 16 | 1 | 29 | 13 | 16 | 0 | 115.54331 | 115.54336 | -0.00005 |
| 30 | 14 | 17 | 1 | 29 | 13 | 17 | 0 | 115.54331 | 115.54336 | -0.00005 |
| 33 | 13 | 20 | 1 | 32 | 12 | 20 | 0 | 115.58368 | 115.58355 | 0.00014  |
| 33 | 13 | 21 | 1 | 32 | 12 | 21 | 0 | 115.58368 | 115.58355 | 0.00013  |
| 19 | 19 | 0  | 1 | 18 | 18 | 0  | 0 | 115.66705 | 115.66717 | -0.00012 |
| 19 | 19 | 1  | 1 | 18 | 18 | 1  | 0 | 115.66705 | 115.66717 | -0.00012 |
| 20 | 19 | 1  | 1 | 19 | 18 | 1  | 0 | 115.76153 | 115.76142 | 0.00010  |
| 20 | 19 | 2  | 1 | 19 | 18 | 2  | 0 | 115.76153 | 115.76142 | 0.00010  |
| 33 | 14 | 19 | 1 | 32 | 13 | 19 | 0 | 115.82441 | 115.82451 | -0.00010 |
| 33 | 14 | 20 | 1 | 32 | 13 | 20 | 0 | 115.82441 | 115.82451 | -0.00010 |
| 21 | 19 | 3  | 1 | 20 | 18 | 3  | 0 | 115.85555 | 115.85576 | -0.00021 |
| 21 | 19 | 2  | 1 | 20 | 18 | 2  | 0 | 115.85555 | 115.85576 | -0.00021 |
| 36 | 13 | 23 | 1 | 35 | 12 | 23 | 0 | 115.86035 | 115.86056 | -0.00021 |
| 36 | 13 | 24 | 1 | 35 | 12 | 24 | 0 | 115.86035 | 115.86057 | -0.00021 |
| 22 | 19 | 4  | 1 | 21 | 18 | 4  | 0 | 115.95018 | 115.95016 | 0.00001  |
| 22 | 19 | 3  | 1 | 21 | 18 | 3  | 0 | 115.95018 | 115.95016 | 0.00001  |
| 20 | 20 | 0  | 1 | 19 | 19 | 0  | 0 | 115.98884 | 115.98879 | 0.00005  |
| 20 | 20 | 1  | 1 | 19 | 19 | 1  | 0 | 115.98884 | 115.98879 | 0.00005  |
| 32 | 16 | 16 | 1 | 31 | 15 | 16 | 0 | 116.20352 | 116.20355 | -0.00003 |
| 32 | 16 | 17 | 1 | 31 | 15 | 17 | 0 | 116.20352 | 116.20355 | -0.00003 |
| 23 | 20 | 3  | 1 | 22 | 19 | 3  | 0 | 116.27217 | 116.27203 | 0.00014  |
| 23 | 20 | 4  | 1 | 22 | 19 | 4  | 0 | 116.27217 | 116.27203 | 0.00014  |
| 22 | 21 | 2  | 1 | 21 | 20 | 2  | 0 | 116.40336 | 116.40342 | -0.00006 |

---

---

|    |    |    |   |    |    |    |   |           |           |          |
|----|----|----|---|----|----|----|---|-----------|-----------|----------|
| 22 | 21 | 1  | 1 | 21 | 20 | 1  | 0 | 116.40336 | 116.40342 | -0.00006 |
| 35 | 16 | 19 | 1 | 34 | 15 | 19 | 0 | 116.48660 | 116.48652 | 0.00008  |
| 35 | 16 | 20 | 1 | 34 | 15 | 20 | 0 | 116.48660 | 116.48652 | 0.00008  |
| 23 | 21 | 2  | 1 | 22 | 20 | 2  | 0 | 116.49811 | 116.49791 | 0.00020  |
| 23 | 21 | 3  | 1 | 22 | 20 | 3  | 0 | 116.49811 | 116.49791 | 0.00020  |
| 33 | 17 | 16 | 1 | 32 | 16 | 16 | 0 | 116.53117 | 116.53127 | -0.00010 |
| 33 | 17 | 17 | 1 | 32 | 16 | 17 | 0 | 116.53117 | 116.53127 | -0.00010 |
| 28 | 20 | 8  | 1 | 27 | 19 | 8  | 0 | 116.74536 | 116.74546 | -0.00010 |
| 28 | 20 | 9  | 1 | 27 | 19 | 9  | 0 | 116.74536 | 116.74546 | -0.00010 |
| 23 | 23 | 0  | 1 | 22 | 22 | 0  | 0 | 116.94506 | 116.94519 | -0.00012 |
| 23 | 23 | 1  | 1 | 22 | 22 | 1  | 0 | 116.94506 | 116.94519 | -0.00012 |
| 36 | 18 | 18 | 1 | 35 | 17 | 18 | 0 | 117.04705 | 117.04700 | 0.00005  |
| 36 | 18 | 19 | 1 | 35 | 17 | 19 | 0 | 117.04705 | 117.04700 | 0.00005  |
| 29 | 21 | 9  | 1 | 28 | 20 | 9  | 0 | 117.06640 | 117.06633 | 0.00007  |
| 29 | 21 | 8  | 1 | 28 | 20 | 8  | 0 | 117.06640 | 117.06633 | 0.00007  |
| 26 | 23 | 3  | 1 | 25 | 22 | 3  | 0 | 117.22918 | 117.22914 | 0.00004  |
| 26 | 23 | 4  | 1 | 25 | 22 | 4  | 0 | 117.22918 | 117.22914 | 0.00004  |
| 26 | 24 | 2  | 1 | 25 | 23 | 2  | 0 | 117.45060 | 117.45054 | 0.00006  |
| 26 | 24 | 3  | 1 | 25 | 23 | 3  | 0 | 117.45060 | 117.45054 | 0.00006  |
| 38 | 19 | 19 | 1 | 37 | 18 | 19 | 0 | 117.46685 | 117.46695 | -0.00010 |
| 38 | 19 | 20 | 1 | 37 | 18 | 20 | 0 | 117.46685 | 117.46695 | -0.00010 |
| 25 | 25 | 0  | 1 | 24 | 24 | 0  | 0 | 117.57566 | 117.57572 | -0.00006 |
| 25 | 25 | 1  | 1 | 24 | 24 | 1  | 0 | 117.57566 | 117.57572 | -0.00006 |
| 26 | 25 | 2  | 1 | 25 | 24 | 2  | 0 | 117.67062 | 117.67045 | 0.00017  |
| 26 | 25 | 1  | 1 | 25 | 24 | 1  | 0 | 117.67062 | 117.67045 | 0.00017  |
| 31 | 23 | 8  | 1 | 30 | 22 | 8  | 0 | 117.70400 | 117.70382 | 0.00018  |
| 31 | 23 | 9  | 1 | 30 | 22 | 9  | 0 | 117.70400 | 117.70382 | 0.00018  |
| 29 | 24 | 5  | 1 | 28 | 23 | 5  | 0 | 117.73523 | 117.73518 | 0.00005  |
| 29 | 24 | 6  | 1 | 28 | 23 | 6  | 0 | 117.73523 | 117.73518 | 0.00005  |
| 44 | 18 | 26 | 1 | 43 | 17 | 26 | 0 | 117.80286 | 117.80305 | -0.00018 |
| 44 | 18 | 27 | 1 | 43 | 17 | 27 | 0 | 117.80286 | 117.80305 | -0.00018 |
| 26 | 26 | 1  | 1 | 25 | 25 | 1  | 0 | 117.88888 | 117.88887 | 0.00001  |
| 26 | 26 | 0  | 1 | 25 | 25 | 0  | 0 | 117.88888 | 117.88887 | 0.00001  |
| 27 | 26 | 1  | 1 | 26 | 25 | 1  | 0 | 117.98360 | 117.98368 | -0.00008 |
| 27 | 26 | 2  | 1 | 26 | 25 | 2  | 0 | 117.98360 | 117.98368 | -0.00008 |
| 31 | 25 | 6  | 1 | 30 | 24 | 6  | 0 | 118.14518 | 118.14525 | -0.00007 |
| 31 | 25 | 7  | 1 | 30 | 24 | 7  | 0 | 118.14518 | 118.14525 | -0.00007 |
| 46 | 19 | 27 | 1 | 45 | 18 | 27 | 0 | 118.22459 | 118.22461 | -0.00003 |
| 46 | 19 | 28 | 1 | 45 | 18 | 28 | 0 | 118.22459 | 118.22461 | -0.00003 |
| 28 | 27 | 2  | 1 | 27 | 26 | 2  | 0 | 118.29553 | 118.29550 | 0.00003  |
| 28 | 27 | 1  | 1 | 27 | 26 | 1  | 0 | 118.29553 | 118.29550 | 0.00003  |
| 29 | 27 | 2  | 1 | 28 | 26 | 2  | 0 | 118.39048 | 118.39047 | 0.00002  |
| 29 | 27 | 3  | 1 | 28 | 26 | 3  | 0 | 118.39048 | 118.39047 | 0.00002  |
| 31 | 27 | 4  | 1 | 30 | 26 | 4  | 0 | 118.58077 | 118.58063 | 0.00014  |

---

|    |    |    |   |    |    |    |   |           |           |          |
|----|----|----|---|----|----|----|---|-----------|-----------|----------|
| 31 | 27 | 5  | 1 | 30 | 26 | 5  | 0 | 118.58077 | 118.58063 | 0.00014  |
| 31 | 30 | 1  | 1 | 30 | 29 | 1  | 0 | 119.22262 | 119.22251 | 0.00011  |
| 31 | 30 | 2  | 1 | 30 | 29 | 2  | 0 | 119.22262 | 119.22251 | 0.00011  |
| 40 | 26 | 15 | 1 | 39 | 25 | 15 | 0 | 119.22262 | 119.22262 | 0.00000  |
| 40 | 26 | 14 | 1 | 39 | 25 | 14 | 0 | 119.22262 | 119.22262 | 0.00000  |
| 47 | 23 | 24 | 1 | 46 | 22 | 24 | 0 | 119.23045 | 119.23045 | -0.00001 |
| 47 | 23 | 25 | 1 | 46 | 22 | 25 | 0 | 119.23045 | 119.23045 | -0.00001 |
| 42 | 27 | 15 | 1 | 41 | 26 | 15 | 0 | 119.63143 | 119.63133 | 0.00010  |
| 42 | 27 | 16 | 1 | 41 | 26 | 16 | 0 | 119.63143 | 119.63133 | 0.00010  |
| 56 | 21 | 35 | 1 | 55 | 20 | 35 | 0 | 119.63143 | 119.63149 | -0.00005 |
| 56 | 21 | 36 | 1 | 55 | 20 | 36 | 0 | 119.63143 | 119.63149 | -0.00005 |
| 48 | 25 | 23 | 1 | 47 | 24 | 23 | 0 | 119.77006 | 119.77005 | 0.00000  |
| 48 | 25 | 24 | 1 | 47 | 24 | 24 | 0 | 119.77006 | 119.77005 | 0.00000  |
| 39 | 29 | 11 | 1 | 38 | 28 | 11 | 0 | 119.77361 | 119.77368 | -0.00007 |
| 39 | 29 | 10 | 1 | 38 | 28 | 10 | 0 | 119.77361 | 119.77368 | -0.00007 |
| 37 | 30 | 7  | 1 | 36 | 29 | 7  | 0 | 119.79488 | 119.79486 | 0.00002  |
| 37 | 30 | 8  | 1 | 36 | 29 | 8  | 0 | 119.79488 | 119.79486 | 0.00002  |
| 35 | 31 | 4  | 1 | 34 | 30 | 4  | 0 | 119.81480 | 119.81478 | 0.00002  |
| 35 | 31 | 5  | 1 | 34 | 30 | 5  | 0 | 119.81480 | 119.81478 | 0.00002  |
| 33 | 32 | 2  | 1 | 32 | 31 | 2  | 0 | 119.83348 | 119.83348 | 0.00000  |
| 33 | 32 | 1  | 1 | 32 | 31 | 1  | 0 | 119.83348 | 119.83348 | 0.00000  |
| 40 | 29 | 12 | 1 | 39 | 28 | 12 | 0 | 119.86950 | 119.86944 | 0.00006  |
| 40 | 29 | 11 | 1 | 39 | 28 | 11 | 0 | 119.86950 | 119.86944 | 0.00006  |
| 38 | 31 | 7  | 1 | 37 | 30 | 7  | 0 | 120.10155 | 120.10153 | 0.00003  |
| 38 | 31 | 8  | 1 | 37 | 30 | 8  | 0 | 120.10155 | 120.10153 | 0.00003  |
| 41 | 30 | 11 | 1 | 40 | 29 | 11 | 0 | 120.17767 | 120.17784 | -0.00017 |
| 41 | 30 | 12 | 1 | 40 | 29 | 12 | 0 | 120.17767 | 120.17784 | -0.00017 |
| 37 | 32 | 6  | 1 | 36 | 31 | 6  | 0 | 120.21523 | 120.21539 | -0.00016 |
| 37 | 32 | 5  | 1 | 36 | 31 | 5  | 0 | 120.21523 | 120.21539 | -0.00016 |
| 42 | 30 | 12 | 1 | 41 | 29 | 12 | 0 | 120.27383 | 120.27375 | 0.00008  |
| 42 | 30 | 13 | 1 | 41 | 29 | 13 | 0 | 120.27383 | 120.27375 | 0.00008  |
| 45 | 29 | 17 | 1 | 44 | 28 | 17 | 0 | 120.34912 | 120.34912 | 0.00000  |
| 45 | 29 | 16 | 1 | 44 | 28 | 16 | 0 | 120.34912 | 120.34912 | 0.00000  |
| 38 | 34 | 4  | 1 | 37 | 33 | 4  | 0 | 120.72564 | 120.72564 | 0.00001  |
| 38 | 34 | 5  | 1 | 37 | 33 | 5  | 0 | 120.72564 | 120.72564 | 0.00001  |
| 36 | 36 | 1  | 1 | 35 | 35 | 1  | 0 | 120.94292 | 120.94303 | -0.00011 |
| 36 | 36 | 0  | 1 | 35 | 35 | 0  | 0 | 120.94292 | 120.94303 | -0.00011 |
| 48 | 31 | 17 | 1 | 47 | 30 | 17 | 0 | 121.06169 | 121.06167 | 0.00002  |
| 48 | 31 | 18 | 1 | 47 | 30 | 18 | 0 | 121.06169 | 121.06167 | 0.00002  |
| 49 | 31 | 18 | 1 | 48 | 30 | 18 | 0 | 121.15815 | 121.15800 | 0.00014  |
| 49 | 31 | 19 | 1 | 48 | 30 | 19 | 0 | 121.15815 | 121.15800 | 0.00014  |
| 39 | 36 | 4  | 1 | 38 | 35 | 4  | 0 | 121.23016 | 121.23005 | 0.00011  |
| 39 | 36 | 3  | 1 | 38 | 35 | 3  | 0 | 121.23016 | 121.23005 | 0.00011  |
| 37 | 37 | 1  | 1 | 36 | 36 | 1  | 0 | 121.24065 | 121.24074 | -0.00009 |

|    |    |    |   |    |    |    |   |           |           |          |
|----|----|----|---|----|----|----|---|-----------|-----------|----------|
| 37 | 37 | 0  | 1 | 36 | 36 | 0  | 0 | 121.24065 | 121.24074 | -0.00009 |
| 38 | 37 | 1  | 1 | 37 | 36 | 1  | 0 | 121.33641 | 121.33641 | 0.00000  |
| 38 | 37 | 2  | 1 | 37 | 36 | 2  | 0 | 121.33641 | 121.33641 | 0.00000  |
| 45 | 34 | 12 | 1 | 44 | 33 | 12 | 0 | 121.39748 | 121.39737 | 0.00011  |
| 45 | 34 | 11 | 1 | 44 | 33 | 11 | 0 | 121.39748 | 121.39737 | 0.00011  |
| 38 | 38 | 1  | 1 | 37 | 37 | 1  | 0 | 121.53700 | 121.53706 | -0.00005 |
| 38 | 38 | 0  | 1 | 37 | 37 | 0  | 0 | 121.53700 | 121.53706 | -0.00005 |
| 41 | 37 | 5  | 1 | 40 | 36 | 5  | 0 | 121.62383 | 121.62390 | -0.00007 |
| 41 | 37 | 4  | 1 | 40 | 36 | 4  | 0 | 121.62383 | 121.62390 | -0.00007 |
| 42 | 37 | 5  | 1 | 41 | 36 | 5  | 0 | 121.71981 | 121.71988 | -0.00007 |
| 42 | 37 | 6  | 1 | 41 | 36 | 6  | 0 | 121.71981 | 121.71988 | -0.00007 |
| 40 | 38 | 3  | 1 | 39 | 37 | 3  | 0 | 121.72847 | 121.72864 | -0.00017 |
| 40 | 38 | 2  | 1 | 39 | 37 | 2  | 0 | 121.72847 | 121.72864 | -0.00017 |
| 41 | 38 | 3  | 1 | 40 | 37 | 3  | 0 | 121.82448 | 121.82455 | -0.00007 |
| 41 | 38 | 4  | 1 | 40 | 37 | 4  | 0 | 121.82448 | 121.82455 | -0.00007 |
| 39 | 39 | 0  | 1 | 38 | 38 | 0  | 0 | 121.83202 | 121.83198 | 0.00003  |
| 39 | 39 | 1  | 1 | 38 | 38 | 1  | 0 | 121.83202 | 121.83198 | 0.00003  |
| 42 | 39 | 4  | 1 | 41 | 38 | 4  | 0 | 122.11972 | 122.11971 | 0.00001  |
| 42 | 39 | 3  | 1 | 41 | 38 | 3  | 0 | 122.11972 | 122.11971 | 0.00001  |
| 45 | 38 | 8  | 1 | 44 | 37 | 8  | 0 | 122.20888 | 122.20893 | -0.00005 |
| 45 | 38 | 7  | 1 | 44 | 37 | 7  | 0 | 122.20888 | 122.20893 | -0.00005 |
| 42 | 41 | 2  | 1 | 41 | 40 | 2  | 0 | 122.51353 | 122.51365 | -0.00012 |
| 42 | 41 | 1  | 1 | 41 | 40 | 1  | 0 | 122.51353 | 122.51365 | -0.00012 |
| 51 | 37 | 14 | 1 | 50 | 36 | 14 | 0 | 122.58683 | 122.58693 | -0.00010 |
| 51 | 37 | 15 | 1 | 50 | 36 | 15 | 0 | 122.58683 | 122.58693 | -0.00010 |
| 49 | 38 | 11 | 1 | 48 | 37 | 11 | 0 | 122.59455 | 122.59447 | 0.00008  |
| 49 | 38 | 12 | 1 | 48 | 37 | 12 | 0 | 122.59455 | 122.59447 | 0.00008  |
| 42 | 42 | 1  | 1 | 41 | 41 | 1  | 0 | 122.70832 | 122.70843 | -0.00011 |
| 42 | 42 | 0  | 1 | 41 | 41 | 0  | 0 | 122.70832 | 122.70843 | -0.00011 |
| 48 | 40 | 9  | 1 | 47 | 39 | 9  | 0 | 122.89499 | 122.89491 | 0.00008  |
| 48 | 40 | 8  | 1 | 47 | 39 | 8  | 0 | 122.89499 | 122.89491 | 0.00008  |
| 47 | 41 | 7  | 1 | 46 | 40 | 7  | 0 | 122.99492 | 122.99472 | 0.00020  |
| 47 | 41 | 6  | 1 | 46 | 40 | 6  | 0 | 122.99492 | 122.99472 | 0.00020  |
| 48 | 42 | 6  | 1 | 47 | 41 | 6  | 0 | 123.28599 | 123.28595 | 0.00004  |
| 48 | 42 | 7  | 1 | 47 | 41 | 7  | 0 | 123.28599 | 123.28595 | 0.00004  |
| 49 | 42 | 7  | 1 | 48 | 41 | 7  | 0 | 123.38246 | 123.38247 | -0.00001 |
| 49 | 42 | 8  | 1 | 48 | 41 | 8  | 0 | 123.38246 | 123.38247 | -0.00001 |
| 48 | 43 | 5  | 1 | 47 | 42 | 5  | 0 | 123.47931 | 123.47927 | 0.00004  |
| 48 | 43 | 6  | 1 | 47 | 42 | 6  | 0 | 123.47931 | 123.47927 | 0.00004  |
| 49 | 43 | 6  | 1 | 48 | 42 | 6  | 0 | 123.57579 | 123.57579 | 0.00000  |
| 49 | 43 | 7  | 1 | 48 | 42 | 7  | 0 | 123.57579 | 123.57579 | 0.00000  |
| 51 | 42 | 9  | 1 | 50 | 41 | 9  | 0 | 123.57579 | 123.57572 | 0.00007  |
| 51 | 42 | 10 | 1 | 50 | 41 | 10 | 0 | 123.57579 | 123.57572 | 0.00007  |
| 46 | 45 | 2  | 1 | 45 | 44 | 2  | 0 | 123.66879 | 123.66871 | 0.00008  |

|    |    |    |   |    |    |    |   |           |           |          |
|----|----|----|---|----|----|----|---|-----------|-----------|----------|
| 46 | 45 | 1  | 1 | 45 | 44 | 1  | 0 | 123.66879 | 123.66871 | 0.00008  |
| 52 | 42 | 10 | 1 | 51 | 41 | 10 | 0 | 123.67248 | 123.67245 | 0.00003  |
| 52 | 42 | 11 | 1 | 51 | 41 | 11 | 0 | 123.67248 | 123.67245 | 0.00003  |
| 51 | 43 | 9  | 1 | 50 | 42 | 9  | 0 | 123.76909 | 123.76905 | 0.00004  |
| 51 | 43 | 8  | 1 | 50 | 42 | 8  | 0 | 123.76909 | 123.76905 | 0.00004  |
| 53 | 43 | 11 | 1 | 52 | 42 | 11 | 0 | 123.96260 | 123.96260 | -0.00001 |
| 53 | 43 | 10 | 1 | 52 | 42 | 10 | 0 | 123.96260 | 123.96260 | -0.00001 |
| 54 | 43 | 12 | 1 | 53 | 42 | 12 | 0 | 124.05951 | 124.05949 | 0.00002  |
| 54 | 43 | 11 | 1 | 53 | 42 | 11 | 0 | 124.05951 | 124.05949 | 0.00002  |
| 51 | 45 | 6  | 1 | 50 | 44 | 6  | 0 | 124.15127 | 124.15132 | -0.00005 |
| 51 | 45 | 7  | 1 | 50 | 44 | 7  | 0 | 124.15127 | 124.15132 | -0.00005 |
| 63 | 41 | 23 | 1 | 62 | 40 | 23 | 0 | 124.54590 | 124.54605 | -0.00015 |
| 63 | 41 | 22 | 1 | 62 | 40 | 22 | 0 | 124.54590 | 124.54605 | -0.00015 |
| 62 | 42 | 20 | 1 | 61 | 41 | 20 | 0 | 124.64359 | 124.64356 | 0.00003  |
| 62 | 42 | 21 | 1 | 61 | 41 | 21 | 0 | 124.64359 | 124.64356 | 0.00003  |
| 65 | 41 | 25 | 1 | 64 | 40 | 25 | 0 | 124.74112 | 124.74110 | 0.00002  |
| 65 | 41 | 24 | 1 | 64 | 40 | 24 | 0 | 124.74112 | 124.74110 | 0.00002  |
| 58 | 45 | 13 | 1 | 57 | 44 | 13 | 0 | 124.83005 | 124.83009 | -0.00004 |
| 58 | 45 | 14 | 1 | 57 | 44 | 14 | 0 | 124.83005 | 124.83009 | -0.00004 |
| 59 | 45 | 14 | 1 | 58 | 44 | 14 | 0 | 124.92750 | 124.92734 | 0.00016  |
| 59 | 45 | 15 | 1 | 58 | 44 | 15 | 0 | 124.92750 | 124.92734 | 0.00016  |
| 58 | 46 | 13 | 1 | 57 | 45 | 13 | 0 | 125.01907 | 125.01907 | 0.00001  |
| 58 | 46 | 12 | 1 | 57 | 45 | 12 | 0 | 125.01907 | 125.01907 | 0.00001  |
